# Supplementary material for: Evolution and Classification of Musaceae Based on Male Floral Morphology
Source: MDPI journal article supplement (doi:10.3390/plants12081602), 2023-04-10
Supplement: s1 [file s1]

Supporting information

Table S1 List of banana accessions used in the phenetic analysis.

| #                                                    | Taxon                                                                              | Accession    | Source/Origin                    |
|------------------------------------------------------|------------------------------------------------------------------------------------|--------------|----------------------------------|
| Genus: <i>Musa</i> L.                                |                                                                                    |              |                                  |
| Section: <i>Musa</i> (included <i>Rhodochlamys</i> ) |                                                                                    |              |                                  |
| 1.                                                   | <i>Musa acuminata</i> Colla subsp. sp.1                                            | SS & JS 104  | Chumphon                         |
| 2.                                                   | <i>Musa acuminata</i> Colla subsp. sp.1                                            | SS & JS 107  | Chumphon                         |
| 3.                                                   | <i>Musa acuminata</i> Colla subsp. <i>malaccensis</i> (Ridl.) N.W. Simmonds        | SS & JS 211  | Satun                            |
| 4.                                                   | <i>Musa acuminata</i> Colla subsp. <i>siamea</i> N.W. Simmonds                     | SS & JS 001  | Phetchabun                       |
| 5.                                                   | <i>Musa acuminata</i> Colla subsp. <i>siamea</i> N.W. Simmonds                     | SS & JS 247  | Kanchanaburi                     |
| 6.                                                   | <i>Musa acuminata</i> Colla subsp. <i>siamea</i> N.W. Simmonds                     | SS & JS 300  | Nakon Nayok                      |
| 7.                                                   | <i>Musa acuminata</i> Colla subsp. <i>truncata</i> (Ridl.) Kiew                    | SS & JS 206  | Yala                             |
| 8.                                                   | <i>Musa acuminata</i> Colla subsp. <i>truncata</i> (Ridl.) Kiew                    | SS & JS 493  | Narathiwat                       |
| 9.                                                   | <i>Musa acuminata</i> Colla subsp. <i>zebrina</i> (Van Houtte ex Planch.) Nasution | SS & JS 155  | Chiang Mai <sup>1</sup>          |
| 10.                                                  | <i>Musa balbisiana</i> Colla                                                       | SS & JS 003  | Sukhothai                        |
| 11.                                                  | <i>Musa balbisiana</i> Colla                                                       | SS & JS 012  | Nan                              |
| 12.                                                  | <i>Musa balbisiana</i> Colla                                                       | SS & JS 354  | Mae Hong Son                     |
| 13.                                                  | <i>Musa flaviflora</i> (King ex Baker) A.M.Cowan & Cowan                           | Simmonds 241 | India <sup>6, K</sup>            |
| 14.                                                  | <i>Musa itinerans</i> Cheesman                                                     | SS & JS 100  | Phetchabun                       |
| 15.                                                  | <i>Musa itinerans</i> Cheesman                                                     | SS & JS 306  | Kamphaeng Phet                   |
| 16.                                                  | <i>Musa itinerans</i> Cheesman                                                     | SS & JS 517  | Chiang Mai                       |
| 17.                                                  | <i>Musa nagensium</i> Prain                                                        | SS & JS 610  | Yunnan, China <sup>6, XTBG</sup> |
| 18.                                                  | <i>Musa nanensis</i> Swangpol & Traiperm                                           | SS & JS 505  | Nan                              |
| 19.                                                  | <i>Musa nanensis</i> Swangpol & Traiperm                                           | SS & JS 527  | Nan                              |
| 20.                                                  | <i>Musa ornata</i> Roxb. ‘Bua Si Muang’                                            | SS & JS 169  | Nakhon Ratchasima <sup>4</sup>   |
| 21.                                                  | <i>Musa ornata</i> Roxb. ‘Bua Luang’                                               | SS & JS 433  | Kamphaeng Phet <sup>4</sup>      |

| #                                                                | Taxon                                                              | Accession    | Source/Origin                    |
|------------------------------------------------------------------|--------------------------------------------------------------------|--------------|----------------------------------|
| 22.                                                              | <i>Musa ornata</i> Roxb. ‘Bua Si Chomphu’                          | SS & JS 515  | Bangkok <sup>4</sup>             |
| 23.                                                              | <i>Musa ornata</i> Roxb. ‘Bua Si Chomphu ’                         | SS & JS 542  | Chiang Mai <sup>3</sup>          |
| 24.                                                              | <i>Musa ornata</i> Roxb. ‘Bua Si Muang’                            | SS & JS 543  | Chiang Mai <sup>3</sup>          |
| 25.                                                              | <i>Musa ornata</i> Roxb. ‘Bua Luang’                               | SS & JS 568  | Bangkok <sup>4</sup>             |
| 26.                                                              | <i>Musa ornata</i> Roxb. ‘Bua Khao’                                | SS & JS 593  | Chiang Mai <sup>3</sup>          |
| 27.                                                              | <i>Musa rubra</i> Wall. ex Kurz                                    | SS & JS 352  | Mae Hong Son                     |
| 28.                                                              | <i>Musa rubra</i> Wall. ex Kurz                                    | SS & JS 420  | Mae Hong Son                     |
| 29.                                                              | <i>Musa rubra</i> Wall. ex Kurz                                    | SS & JS 516  | Bangkok <sup>4</sup>             |
| 30.                                                              | <i>Musa serpentina</i> Swangpol & Somana                           | SS & JS 246  | Kanchanaburi                     |
| 31.                                                              | <i>Musa serpentina</i> Swangpol & Somana                           | SS & JS 353  | Mae Hong Son                     |
| 32.                                                              | <i>Musa serpentina</i> Swangpol & Somana                           | SS & JS 355  | Mae Hong Son                     |
| 33.                                                              | <i>Musa siamensis</i> Häkkinen & Rich.H.Wallace                    | SS & JS 524  | Bangkok <sup>4</sup>             |
| 34.                                                              | <i>Musa velutina</i> H.Wendl. & Drude                              | SS & JS 520  | Chiang Mai <sup>1</sup>          |
| 35.                                                              | <i>Musa</i> cf. <i>yunnanensis</i>                                 | SS & JS 255  | Chiang Mai                       |
| 36.                                                              | <i>Musa</i> cf. <i>yunnanensis</i>                                 | SS & JS 444  | Chiang Mai                       |
| 37.                                                              | <i>Musa</i> cf. <i>yunnanensis</i>                                 | SS & JS 531  | Chiang Mai                       |
| <b>Section : <i>Callimusa</i> (included <i>Australimusa</i>)</b> |                                                                    |              |                                  |
| 38.                                                              | <i>Musa beccarii</i> N.W.Simmonds                                  | SS & JS 539  | Bangkok <sup>4</sup>             |
| 39.                                                              | <i>Musa coccinea</i> Andrews                                       | SS & JS 223  | Phetchabun <sup>4</sup>          |
| 40.                                                              | <i>Musa coccinea</i> Andrews                                       | SS & JS 519  | Chiang Mai <sup>4</sup>          |
| 41.                                                              | <i>Musa ingens</i> N.W.Simmonds                                    | B. E. 40     | Papua New Guinea <sup>6, K</sup> |
| 42.                                                              | <i>Musa gracilis</i> Holttum                                       | SS & JS 487  | Narathiwat                       |
| 43.                                                              | <i>Musa gracilis</i> Holttum                                       | SS & JS 488  | Narathiwat                       |
| 44.                                                              | <i>Musa haekkinenii</i> N.S.Lý & Haev.                             | SS & JS 540  | Bangkok <sup>4</sup>             |
| 45.                                                              | <i>Musa maclayi</i> F.Muell. ex Mikl.-Maclay                       | Carr 15590   | Papua New Guinea <sup>6, K</sup> |
| 46.                                                              | <i>Musa maclayi</i> F.Muell. ex Mikl.-Maclay subsp. <i>maclayi</i> | B.E. 40      | Papua New Guinea <sup>6, K</sup> |
| 47.                                                              | <i>Musa maclayi</i> F.Muell. ex Mikl.-Maclay                       | Poulsen 3132 | Papua New Guinea <sup>6, K</sup> |
| 48.                                                              | <i>Musa paracoccinea</i> A.Z.Liu & D.Z.Li                          | SS & JS 611  | Yunnan, China <sup>5</sup>       |

| #                                    | Taxon                                                                   | Accession              | Source/Origin                      |
|--------------------------------------|-------------------------------------------------------------------------|------------------------|------------------------------------|
| 49.                                  | <i>Musa textilis</i> Née                                                | P.F. Stevens et al 461 | Sabah, Malesia <sup>6, E</sup>     |
| <b>Genus: <i>Ensete</i> Horan.</b>   |                                                                         |                        |                                    |
| 50.                                  | <i>Ensete glaucum</i> (Roxb.) Cheesman                                  | SS & JS 229            | Bangkok <sup>4</sup>               |
| 51.                                  | <i>Ensete glaucum</i> (Roxb.) Cheesman                                  | SS & JS 244            | Kanchanaburi                       |
| 52.                                  | <i>Ensete glaucum</i> (Roxb.) Cheesman                                  | SS & JS 317            | Tak                                |
| 53.                                  | <i>Ensete gillettii</i> (= <i>livingstonianum</i> ) (De Wild.) Cheesman | Keay 28003             | Nigeria <sup>6, K</sup>            |
| 54.                                  | <i>Ensete homblei</i> (Bequaert ex De Wild.) Cheesman                   | Milne-Redhead 3062     | Zimbabwe, Rhodesia <sup>6, K</sup> |
| 55.                                  | <i>Ensete superbum</i> (Roxb.) Cheesman                                 | SS & JS 242            | Kanchanaburi                       |
| 56.                                  | <i>Ensete superbum</i> (Roxb.) Cheesman                                 | SS & JS 391            | Kanchanaburi                       |
| 57.                                  | <i>Ensete superbum</i> (Roxb.) Cheesman                                 | SS & JS 541            | Chiang Mai <sup>1</sup>            |
| <b>Genus: <i>Musella</i> C.Y. Wu</b> |                                                                         |                        |                                    |
| 58.                                  | <i>Musella lasiocarpa</i> (Franch.) C.Y. Wu ex H.W. Li                  | SS & JS 231            | Nakhon Ratchasima <sup>4</sup>     |
| 59.                                  | <i>Musella lasiocarpa</i> (Franch.) C.Y. Wu ex H.W. Li                  | SS & JS 594            | Phetburi collection <sup>4</sup>   |

<sup>1</sup>QSBG (Queen Sirikit Botanic Garden, Chiang Mai, Thailand); <sup>2</sup>banana collection, Bangkok, Thailand;  
<sup>3</sup>Royal Project Inthanon, Chiang Mai, Thailand; <sup>4</sup>Cultivated bananas in Thailand; <sup>5</sup>Cultivated bananas  
in different countries; <sup>6</sup>Wild bananas collected in different countries deposited in the herbaria: E = RBG  
Edinburgh; K = RBG Kew; XTBG = Xishuangbanna Tropical Botanical Garden

**Table S2.** List of sequences of Zingiberales-Musaceae used in the phylogenetic analysis.

| No. | Family    | Species                         | Accession        | ITS      | <i>rps16</i> | <i>trnL-F</i> | <i>atpB-rbcL</i> |
|-----|-----------|---------------------------------|------------------|----------|--------------|---------------|------------------|
| 1.  | Typhaceae | <i>Sparganium</i> sp.           | -                | -        | HQ913892     | HQ882765      | JF280745         |
| 2.  |           | <i>Typha angustifolia</i>       | -                | -        | AM116858     | JF319450      | FJ914237         |
| 3.  | Cannaceae | <i>Canna indica</i>             | 19981130-03 (BR) | KU215028 | KU214891     | KU215151      | -                |
| 4.  |           | <i>Canna paniculata</i>         | -                | AY673069 | AY656159     | AY140423      | -                |
| 5.  | Costaceae | <i>Chamaecostus cuspidatus</i>  | 19381338 (BR)    | KU215041 | -            | KU215165      | -                |
| 6.  |           | <i>Chamaecostus subsessilis</i> | -                | AY994717 | KJ011420     | AY994555      | -                |
| 7.  |           | <i>Costus allenii</i>           | 19730144 (BR)    | KU215031 | KU214894     | KU215154      | KU215248         |
| 8.  |           | <i>Costus amazonicus</i>        | -                | AY041032 | KJ011354     | AY994586      | -                |
| 9.  |           | <i>Costus arabicus</i>          | 19730142 (BR)    | KU215034 | KU214897     | KU215156      | KU215251         |
| 10. |           | <i>Costus barbatus</i>          | -                | AY041031 | KJ011357     | AY994585      | -                |
| 11. |           | <i>Costus chartaceus</i>        | -                | AY972911 | KJ011360     | AY994559      | -                |
| 12. |           | <i>Costus claviger</i>          | -                | AY972882 | KJ011361     | AY994584      | -                |
| 13. |           | <i>Costus deisetii</i>          | 19615174 (BR)    | KU215038 | KU214901     | -             | KU215255         |
| 14. |           | <i>Costus dinklagei</i>         | -                | AY994750 | KJ011366     | AY994596      | -                |
| 15. |           | <i>Costus dubius</i>            | 19594350 (BR)    | KU215040 | KU214903     | KU215161      | KU215257         |
| 16. |           | <i>Costus erythrocoryne</i>     | -                | AY972886 | -            | AY994579      | -                |
| 17. |           | <i>Costus erythrophyllus</i>    | 19730145 (BR)    | KU215030 | KU214893     | KU215153      | KU215247         |
| 18. |           | <i>Costus gabonensis</i>        | -                | AY994747 | KJ011371     | AY994593      | -                |
| 19. |           | <i>Costus guanaiensis</i>       | -                | AY972883 | KJ011374     | AY994577      | -                |
| 20. |           | <i>Costus laevis</i>            | -                | AY041035 | KJ011377     | AY994575      | -                |
| 21. |           | <i>Costus lateriflorus</i>      | -                | AY994734 | KJ011379     | AY994574      | -                |
| 22. |           | <i>Costus letestui</i>          | -                | AY972939 | KJ011380     | AY994573      | -                |
| 23. |           | <i>Costus lucanusianus</i>      | 19620189 (BR)    | KU215039 | KU214902     | KU215160      | KU215256         |
| 24. |           | <i>Costus maculatus</i>         | -                | AY994731 | -            | AY994571      | -                |
| 25. |           | <i>Costus malortienanus</i>     | 10005061 (BR)    | KU215029 | KU214892     | KU215152      | KU215246         |
| 26. |           | <i>Costus montanus</i>          | -                | KU215032 | KU214895     | -             | KU215249         |
| 27. |           | <i>Costus mosaicus</i>          | -                | AY994728 | -            | AY994568      | -                |
| 28. |           | <i>Costus phaeotrichus</i>      | -                | AY994721 | KJ011396     | AY994561      | -                |
| 29. |           | <i>Costus pictus</i>            | 10005272 (BR)    | KU215033 | KU214896     | KU215155      | KU215250         |
| 30. |           | <i>Costus plicatus</i>          | -                | AY041030 | KJ011400     | AY994565      | -                |

| No. | Family        | Species                           | Accession                    | ITS      | <i>rps16</i> | <i>trnL-F</i> | <i>atpB-rbcL</i> |
|-----|---------------|-----------------------------------|------------------------------|----------|--------------|---------------|------------------|
| 31. |               | <i>Costus pulverulentus</i>       | -                            | AY041029 | AY656160     | AY994563      | -                |
| 32. |               | <i>Costus scaber</i>              | 19812689 (BR)                | KU215035 | KU214898     | KU215157      | KU215252         |
| 33. |               | <i>Costus spectabilis</i>         | -                            | AY994718 | KJ011406     | AY994556      | -                |
| 34. |               | <i>Costus stenophyllus</i>        | -                            | AY994720 | KJ011408     | AY994560      | -                |
| 35. |               | <i>Costus talbotii</i>            | -                            | AY994716 | KJ011412     | AY994554      | -                |
| 36. |               | <i>Costus tappenbeckianus</i>     | -                            | AY994715 | -            | AY994553      | -                |
| 37. |               | <i>Costus vargasii</i>            | 19860011 (BR)                | KU215037 | KU214900     | KU215159      | KU215254         |
| 38. |               | <i>Costus varzearum</i>           | -                            | AY994714 | KJ011413     | AY994551      | -                |
| 39. |               | <i>Costus villosissimus</i>       | -                            | AY994713 | KJ011414     | AY994550      | -                |
| 40. |               | <i>Costus zingiberoides</i>       | 19860010 (BR)                | KU215036 | KU214899     | KU215158      | KU215253         |
| 41. |               | <i>Dimerocostus strubilaceus</i>  | 19726435 (BR)                | -        | KU214904     | KU215162      | KU215258         |
| 42. |               | <i>Monocostus uniflora</i>        | 19750179 (BR)                | -        | KU214905     | KU215163      | KU215259         |
| 43. |               | <i>Tapeinochilos ananasae</i>     | 19610260 (BR)                | -        | KU214906     | KU215164      | KU215260         |
| 44. | Heliconiaceae | <i>Heliconia acuminata</i>        | 19830761 (BR)                | -        | -            | KU215166      | KU215261         |
| 45. |               | <i>Heliconia angusta</i>          | 19750486 (BR)                | -        | -            | KU214909      | -                |
| 46. |               | <i>Heliconia caribaea</i>         | -                            | FJ428106 | FJ428109     | FJ428179      | FJ428018         |
| 47. |               | <i>Heliconia densiflora</i>       | 19880067 (BR)                | -        | -            | -             | KU215263         |
| 48. |               | <i>Heliconia hirsuta</i>          | Van Caecckenberghe s.n. (BR) | -        | -            | KU214912      | KU215267         |
| 49. |               | <i>Heliconia humilis</i>          | 19861386 (BR)                | -        | KU214910     | KU215168      | KU215265         |
| 50. |               | <i>Heliconia illustris</i>        | 10005273 (BR)                | -        | KU214907     | -             | KU215262         |
| 51. |               | <i>Heliconia indica</i>           | 19730253 (BR)                | -        | KU214908     | KU215167      | KU215264         |
| 52. |               | <i>Heliconia psittacorum</i>      | -                            | FJ428105 | FJ428108     | FJ428180      | FJ428016         |
| 53. |               | <i>Heliconia rickardiana</i>      | 19940052-53 (BR)             | -        | KU214913     | -             | KU215268         |
| 54. |               | <i>Heliconia rostrata</i>         | 19822412 (BR)                | KU215042 | KU214907     | KU215169      | KU215266         |
| 55. |               | <i>Orchidantha chinensis</i>      | -                            | FJ428181 | FJ428153     | FJ428181      | FJ428061         |
| 56. |               | <i>Orchidantha fimbriata</i>      | -                            | AF434879 | AF430098     | FJ621300      | -                |
| 57. |               | <i>Orchidantha maxillarioides</i> | 19074031 (BR)                | -        | KU214914     | KU215170      | KU215269         |
| 58. |               | <i>Orchidantha siamensis</i>      | -                            | AF434887 | AF430106     | AF431622      | -                |
| 59. | Marantaceae   | <i>Afrocalathea rhizantha</i>     | -                            | EU605908 | EF382847     | EU647816      | -                |
| 60. |               | <i>Calathea altissima</i>         | -                            | JQ341268 | AF141025     | JN413119      | -                |
| 61. |               | <i>Calathea capitata</i>          | -                            | JQ341271 | AF141026     | JQ341219      | -                |

| No. | Family | Species                         | Accession                  | ITS      | <i>rps16</i> | <i>trnL-F</i> | <i>atpB-rbcL</i> |
|-----|--------|---------------------------------|----------------------------|----------|--------------|---------------|------------------|
| 62. |        | <i>Calathea mackeyana</i>       | 19073768 (BR)              | KU215049 | KU214921     | KU215175      | KU215274         |
| 63. |        | <i>Calathea majestica</i>       | 19700532 (BR)              | KU215051 | KU214923     | KU215177      | KU215276         |
| 64. |        | <i>Calathea marantifolia</i>    | 19760485 (BR)              | KU215043 | KU214915     | KU215171      | KU215270         |
| 65. |        | <i>Calathea metallica</i>       | -                          | AY673046 | AF141030     | AY140354      | -                |
| 66. |        | <i>Calathea micans</i>          | -                          | JQ341289 | AF141031     | JN413140      | -                |
| 67. |        | <i>Calathea microcephala</i>    | -                          | -        | KU214932     | -             | KU215281         |
| 68. |        | <i>Calathea mirabilis</i>       | -                          | KU215045 | KU214917     | KU215173      | -                |
| 69. |        | <i>Calathea petersenii</i>      | -                          | JQ341294 | AF141032     | JQ341237      | -                |
| 70. |        | <i>Calathea picturata</i>       | Van Caekenberghe s.n. (BR) | KU215055 | KU214928     | -             | -                |
| 71. |        | <i>Calathea rufibarba</i>       | -                          | AY673048 | AF141035     | AY140360      | -                |
| 72. |        | <i>Calathea undulata</i>        | Van Caekenberghe s.n. (BR) | KU215273 | KU215048     | KU214920      | -                |
| 73. |        | <i>Calathea variegata</i>       | 19820964 (BR)              | -        | KU215047     | KU214919      | KU215272         |
| 74. |        | <i>Calathea warscewiczii</i>    | -                          | AY673049 | AY656139     | AY140364      | -                |
| 75. |        | <i>Calathea zebrina</i>         | 19700743 (BR)              | KU215053 | KU214925     | -             | -                |
| 76. |        | <i>Ctenantha amabilis</i>       | 19391944 (BR)              | KU215058 | KU214930     | KU215178      | KU215279         |
| 77. |        | <i>Ctenantha kummeriana</i>     | 19073861 (BR)              | KU215056 | -            | -             | KU215277         |
| 78. |        | <i>Ctenantha oppenheimiana</i>  | 19680371 (BR)              | KU215059 | KU214931     | KU215179      | KU215280         |
| 79. |        | <i>Ctenantha setosa</i>         | 19620507 (BR)              | KU215057 | KU214929     | KU215190      | KU215278         |
| 80. |        | <i>Donax canniformis</i>        | 19733425 (BR)              | KU215069 | KU214945     | KU215191      | -                |
| 81. |        | <i>Groeppertia louisea</i>      | Van Caekenberghe s.n. (BR) | KU215046 | KU214918     | KU215174      | KU215271         |
| 82. |        | <i>Halopegia azurea</i>         | -                          | AY914650 | AF141048     | AY140372      | -                |
| 83. |        | <i>Hypselodephys hirsuta</i>    | Hypselodelphys hirsuta     | KU215064 | KU214939     | KU215186      | KU215288         |
| 84. |        | <i>Indianthus virgatus</i>      | -                          | AY914666 | AY914620     | AY140411      | -                |
| 85. |        | <i>Ischnosiphon heleniae</i>    | -                          | AY673055 | AY656145     | AY140379      | -                |
| 86. |        | <i>Ischnosiphon leucophaeus</i> | -                          | JQ341309 | AF141053     | JN413162      | -                |
| 87. |        | <i>Ischnosiphon ovatus</i>      | Van Caekenberghe s.n. (BR) | KU215067 | KU214942     | -             | KU215291         |
| 88. |        | <i>Maranta bicolor</i>          | 19074039 (BR)              | KU215061 | KU214934     | KU215181      | KU215283         |
| 89. |        | <i>Maranta depressa</i>         | 19700747 (BR)              | KU215060 | KU214933     | KU215180      | KU215282         |
| 90. |        | <i>Maranta leuconeura</i>       | 19660030 (BR)              | KU215062 | KU214935     | KU215182      | KU215284         |
| 91. |        | <i>Marantochloa conferta</i>    | Van Caekenberghe s.n. (BR) | -        | KU214943     | KU215188      | -                |
| 92. |        | <i>Marantochloa congensis</i>   | -                          | EU605903 | AF141062     | EU647811      | -                |

| No.  | Family   | Species                                     | Accession        | ITS      | <i>rps16</i> | <i>trnL-F</i> | <i>atpB-rbcL</i> |
|------|----------|---------------------------------------------|------------------|----------|--------------|---------------|------------------|
| 93.  |          | <i>Marantochloa filipes</i>                 | 19850681 (BR)    | KU215070 | KU214946     | KU215192      | -                |
| 94.  |          | <i>Marantochloa leucantha</i>               | 19547056 (BR)    | -        | KU214938     | KU215185      | KU215287         |
| 95.  |          | <i>Marantochloa purpurea</i>                | -                | AY673057 | AF141067     | AY140389      | -                |
| 96.  |          | <i>Megaphrynium macrostachyum</i>           | 10005583 (BR)    | KU215071 | KU214947     | KU215193      | -                |
| 97.  |          | <i>Monotagma laxum</i>                      | -                | AY673058 | AY656148     | AY140392      | -                |
| 98.  |          | <i>Phrynium giganteum</i>                   | -                | AY673050 | EF382848     | AY140365      | -                |
| 99.  |          | <i>Phrynium imbricatum</i>                  | -                | AY673059 | AY656149     | AY140402      | -                |
| 100. |          | <i>Phrynium maximum</i>                     | -                | AF434901 | AF430118     | AY140398      | -                |
| 101. |          | <i>Phrynium pubinerve</i>                   | -                | JQ341264 | AY914638     | JQ341212      | -                |
| 102. |          | <i>Pleiostachya pruinosa</i>                | 19910154-31 (BR) | KU215063 | KU214937     | KU215184      | KU215286         |
| 103. |          | <i>Sarantha</i> sp.                         | 19575002 (BR)    | KU215065 | KU214940     | KU215187      | KU215289         |
| 104. |          | <i>Sarcophrynium brachystachyum</i>         | 19910155-32 (BR) | KU215072 | KU214948     | KU215194      | KU215285         |
| 105. |          | <i>Sarcophrynium priogonium</i>             | 10005466 (BR)    | -        | KU214936     | KU215183      | -                |
| 106. |          | <i>Schumannianthus dichotomus</i>           | -                | AY673064 | AY656154     | AY140410      | -                |
| 107. |          | <i>Stachyphrynium latifolium</i>            | -                | AY914653 | AY914607     | AY140412      | -                |
| 108. |          | <i>Stachyphrynium repens</i>                | -                | AY673060 | AY656150     | AY140403      | -                |
| 109. |          | <i>Stachyphrynium spicatum</i>              | -                | AY914658 | AY914612     | AY140415      | -                |
| 110. |          | <i>Stachyphrynium sumatranum</i>            | -                | AY914659 | AY914613     | AY140400      | -                |
| 111. |          | <i>Stromanthe partema</i>                   | 19710269 (BR)    | KU215066 | KU214941     | -             | KU215290         |
| 112. |          | <i>Thalia dealbata</i>                      | -                | AY914693 | AY914648     | AY140419      | -                |
| 113. |          | <i>Thalia multiflora</i>                    | 19770092 (BR)    | KU215068 | KU214944     | KU215189      | KU215292         |
| 114. |          | <i>Thaumatococcus daniellii</i>             | -                | AY673067 | AF141091     | AY140421      | -                |
| 115. |          | <i>Trachyphrynium braunianum</i>            | -                | EU605916 | AY656158     | AY140377      | -                |
| 116. | Musaceae | <i>Ensete gillettii</i>                     | ITC1389          | KU215101 | KU214977     | -             | KU215319         |
| 117. |          | <i>Ensete glaucum</i>                       | -                | FJ428154 | FJ428124     | FJ428154      | FJ428019         |
| 118. |          | <i>Ensete glaucum</i>                       | ITC0775          | KU215088 | KU214963     | -             | KU215306         |
| 119. |          | <i>Ensete homblei</i>                       | -                | FJ621290 | -            | FJ621290      | -                |
| 120. |          | <i>Ensete superbum</i>                      | -                | FJ621291 | -            | FJ621291      | -                |
| 121. |          | <i>Ensete superbum</i>                      | SS & JS 583      | ON639613 | ON453859     | ON453869      | ON453850         |
| 122. |          | <i>Ensete ventricosum</i>                   | ITC1387          | KU215100 | KU214976     | KU215215      | -                |
| 123. |          | <i>Musa acuminata</i> subsp. <i>banksii</i> | ITC0617          | KU215083 | KU214959     | KU215206      | KU215302         |

| No.  | Family | Species                                               | Accession      | ITS      | <i>rps16</i> | <i>trnL-F</i> | <i>atpB-rbcL</i> |
|------|--------|-------------------------------------------------------|----------------|----------|--------------|---------------|------------------|
| 124. |        | <i>Musa acuminata</i> subsp. <i>burmannica</i>        | ITC0283        | FJ428083 | FJ428135     | FJ428169      | FJ428041         |
| 125. |        | <i>Musa acuminata</i> subsp. <i>burmannicoides</i>    | ITC0249        | FJ428085 | FJ428133     | FJ428170      | FJ428044         |
| 126. |        | <i>Musa acuminata</i> subsp. sp.1                     | SS & JS 600    | ON639614 | ON453860     | ON453870      | ON453860         |
| 127. |        | <i>Musa acuminata</i> subsp. <i>malaccensis</i>       | ITC0609        | KU176107 | KU176108     | KU176109      | -                |
| 128. |        | <i>Musa acuminata</i> subsp. <i>malaccensis</i>       | ITC1511        | KU215102 | KU214978     | KU215205      | KU215320         |
| 129. |        | <i>Musa acuminata</i> subsp. <i>microcarpa</i>        | ITC0308        | KU215076 | KU214952     | KU215198      | KU215296         |
| 130. |        | <i>Musa acuminata</i> subsp. <i>microcarpa</i>        | ITC0253        | FJ428087 | FJ428140     | FJ428174      | FJ428052         |
| 131. |        | <i>Musa acuminata</i> subsp. <i>siamea</i>            | ITC0672        | KU215122 | KU214997     | -             | KU215338         |
| 132. |        | <i>Musa acuminata</i> subsp. <i>siamea</i>            | SS & JS 173    | ON639615 | ON453861     | KT257581      | ON453852         |
| 133. |        | <i>Musa acuminata</i> subsp. <i>truncata</i>          | ITC0393        | KU215124 | KU214999     | KU215218      | KU215340         |
| 134. |        | <i>Musa acuminata</i> subsp. <i>zebrina</i>           | ITC0728        | KU215087 | KU214962     | -             | -                |
| 135. |        | <i>Musa acuminata</i> subsp. <i>zebrina</i>           | ITC1177        | KU215097 | KU214973     | -             | KU215316         |
| 136. |        | <i>Musa acuminata</i> subsp. <i>zebrina</i>           | ITC1178        | KU215098 | KU214974     | -             | KU215317         |
| 137. |        | <i>Musa acuminata</i> subsp. <i>zebrina</i>           | ITC1179        | KU215099 | KU214975     | -             | KU215318         |
| 138. |        | <i>Musa aurantiaca</i>                                | HBG: 2007–0001 | FJ428090 | FJ428127     | FJ428162      | FJ428037         |
| 139. |        | <i>Musa balbisiana</i>                                | ITC0247        | KU215074 | KU214950     | KU215196      | KU215294         |
| 140. |        | <i>Musa balbisiana</i>                                | ITC0565        | KU215080 | KU214956     | KU215202      | KU215300         |
| 141. |        | <i>Musa balbisiana</i>                                | ITC1587        | KU215114 | KU214989     | -             | KU215330         |
| 142. |        | <i>Musa barioensis</i>                                | ITC1568        | KU215112 | KU214987     | -             | KU215328         |
| 143. |        | <i>Musa basjoo</i>                                    | ITC0061        | KU215073 | KU214949     | KU215195      | KU215293         |
| 144. |        | <i>Musa beccarii</i> var. <i>beccarii</i>             | HBG: 2001–0482 | FJ428065 | FJ428120     | FJ428189      | FJ428028         |
| 145. |        | <i>Musa beccarii</i> var. <i>hottana</i>              | HBG: 2005–0826 | FJ428066 | FJ428115     | FJ428190      | FJ428029         |
| 146. |        | <i>Musa borneensis</i>                                | ITC1531        | KU215110 | KU214985     | -             | KU215326         |
| 147. |        | <i>Musa campestris</i> subsp. <i>sarawakensis</i>     | ITC1517        | KU215104 | KU214980     | -             | KU215322         |
| 148. |        | <i>Musa cheesmanii</i>                                | ITC1519        | KU215106 | KU214982     | -             | KU215323         |
| 149. |        | <i>Musa coccinea</i>                                  | ITC0287        | KU215078 | KU214954     | KU215200      | KU215298         |
| 150. |        | <i>Musa exotica</i>                                   | ITC1532        | KU215111 | KU214986     | -             | KU215327         |
| 151. |        | <i>Musa gracilis</i>                                  | HBG: 2001–0452 | FJ428075 | FJ428111     | FJ428194      | FJ428022         |
| 152. |        | <i>Musa hirta</i>                                     | HBG: 2004–0366 | FJ428074 | FJ428117     | FJ428199      | FJ428026         |
| 153. |        | <i>Musa ingens</i>                                    | HBG: 2005–0375 | FJ428077 | FJ428118     | FJ428184      | FJ428036         |
| 154. |        | <i>Musa itinerans</i> subsp. <i>xishuangbanaensis</i> | ITC1526        | KU215108 | KU214984     |               | KU215325         |



| No.  | Family | Species                                                       | Accession      | ITS      | <i>rps16</i> | <i>trnL-F</i> | <i>atpB-rbcL</i> |
|------|--------|---------------------------------------------------------------|----------------|----------|--------------|---------------|------------------|
| 155. |        | <i>Musa jackeyi</i>                                           | ITC0588        | KU215081 | KU214957     | KU215203      | KU215301         |
| 156. |        | <i>Musa laterita</i>                                          | HBG: 2001–0448 | FJ428082 | FJ428136     | FJ428157      | FJ428033         |
| 157. |        | <i>Musa lolodensis</i>                                        | ITC0956        | KU215094 | KU214970     | KU215213      | KU215313         |
| 158. |        | <i>Musa lutea</i>                                             | ITC1515        | KU215103 | KU214979     | -             | KU215321         |
| 159. |        | <i>Musa maclayi</i>                                           | ITC0864        | FJ428068 | FJ428122     | FJ428183      | FJ428032         |
| 160. |        | <i>Musa maclayi</i> subsp. <i>ailuluai</i>                    | ITC0614        | KU215116 | KU214991     | KU215216      | KU215332         |
| 161. |        | <i>Musa maclayi</i> subsp. <i>maclayi</i>                     | ITC0934        | KU215119 | KU214994     | -             | KU215335         |
| 162. |        | <i>Musa maclayi</i> subsp. <i>maclayi</i> var. <i>maclayi</i> | ITC0915        | KU215091 | KU214967     | KU215212      | KU215310         |
| 163. |        | <i>Musa mannii</i>                                            | ITC0543        | KU215079 | KU214955     | KU215201      | KU215299         |
| 164. |        | <i>Musa monticola</i>                                         | HBG: 2004–0365 | FJ428073 | FJ428119     | FJ428191      | FJ428049         |
| 165. |        | <i>Musa nagensium</i>                                         | HBG: 2006–0700 | FJ428101 | FJ428144     | FJ428158      | FJ428058         |
| 166. |        | <i>Musa nanensis</i>                                          | SS & JS 612    | ON639616 | ON453853     | ON453871      | ON453862         |
| 167. |        | <i>Musa ornata</i>                                            | ITC0637        | KU215117 | KU214992     | -             | KU215333         |
| 168. |        | <i>Musa ornata</i>                                            | SS & JS 169    | ON639617 | ON453863     | KT257590      | ON453854         |
| 169. |        | <i>Musa peekelii</i> subsp. <i>angustigemma</i>               | ITC0618        | KU215084 | KU214960     | KU215207      | KU215303         |
| 170. |        | <i>Musa peekelii</i> subsp. <i>angustigemma</i>               | ITC0625        | KU215086 | KU214961     | KU215209      | KU215305         |
| 171. |        | <i>Musa peekelii</i> subsp. <i>peekelii</i>                   | ITC0917        | KU215092 | KU214968     | -             | KU215311         |
| 172. |        | <i>Musa rosea</i>                                             | HBG: 2001–0401 | FJ428080 | FJ428131     | FJ428171      | FJ428045         |
| 173. |        | <i>Musa rubinea</i>                                           | HBG: 2003–0768 | FJ428093 | FJ428128     | FJ428163      | FJ428048         |
| 174. |        | <i>Musa rubra</i>                                             | ITC1590        | KU215115 | KU214990     | -             | KU215331         |
| 175. |        | <i>Musa rubra</i>                                             | HBG: 2001–0402 | FJ428081 | FJ428132     | FJ428172      | FJ428046         |
| 176. |        | <i>Musa salaccensis</i>                                       | HBG: 2003–0784 | FJ428072 | FJ428112     | FJ428196      | FJ428023         |
| 177. |        | <i>Musa schizocarpa</i>                                       | ITC0599        | KU215082 | KU214958     | KU215204      | -                |
| 178. |        | <i>Musa schizocarpa</i>                                       | ITC0890        | -        | KU214965     | KU215210      | KU215308         |
| 179. |        | <i>Musa schizocarpa</i>                                       | ITC0926        | KU215093 | KU214969     | -             | KU215312         |
| 180. |        | <i>Musa schizocarpa</i>                                       | ITC1002        | KU215120 | KU214995     | -             | KU215336         |
| 181. |        | <i>Musa serpentina</i>                                        | SS & JS 353    | ON639618 | ON453864     | KT257594      | ON453855         |
| 182. |        | <i>Musa siamensis</i>                                         | HBG: 2002–0844 | FJ428086 | FJ428134     | FJ428168      | FJ428047         |
| 183. |        | <i>Musa textilis</i>                                          | ITC0539        | KU215095 | KU214971     | KU215214      | KU215314         |
| 184. |        | <i>Musa tonkinensis</i>                                       | HBG: 2001–0392 | FJ428099 | FJ428146     | FJ428178      | FJ428055         |
| 185. |        | <i>Musa velutina</i>                                          | ITC0638        | KU215118 | KU214993     | -             | KU215334         |

| No.  | Family         | Species                            | Accession                  | ITS      | <i>rps16</i> | <i>trnL-F</i> | <i>atpB-rbcL</i> |
|------|----------------|------------------------------------|----------------------------|----------|--------------|---------------|------------------|
| 186. |                | <i>Musa violascens</i>             | ITC1514                    | KU215123 | KU214998     | KU215217      | KU215339         |
| 187. |                | <i>Musa yunnanensis</i>            | ITC1573                    | KU215113 | KU214988     | -             | KU215329         |
| 188. |                | <i>Musa</i> cf. <i>yunnanensis</i> | SS & JS 444                | KT257625 | ON453865     | KT257599      | -                |
| 189. |                | <i>Musella lasiocarpa</i>          | HBG: 2005–0824             | FJ428155 | FJ428123     | FJ428155      | FJ428021         |
| 190. | Strelitziaceae | <i>Pherakospermum guianese</i>     | 19812682 (BR)              |          | KU215000     | KU215219      |                  |
| 191. |                | <i>Ravenala madagascariensis</i>   | SCBG: 2005013              | FJ428107 | FJ428110     | FJ428182      | FJ428017         |
| 192. |                | <i>Strelitzia reginae</i>          | -                          | FJ626403 | JQ027166     | FJ621298      |                  |
| 193. | Zingiberaceae  | <i>Aframomum danielii</i>          | 20030092-77 (BR)           | KU215148 | KU215024     | KU215239      | KU215362         |
| 194. |                | <i>Aframomum hanburyi</i>          | Van Caecenberghe s.n. (BR) | KU215147 | KU215023     |               | KU215361         |
| 195. |                | <i>Aframomum korima</i>            | Van Caecenberghe s.n. (BR) | KU215150 |              | KU215241      | KU215364         |
| 196. |                | <i>Aframomum luteoalbum</i>        | -                          | AF414493 | AF414546     | FJ848664      |                  |
| 197. |                | <i>Aframomum thoneri</i>           | 20030090-75 (BR)           | KU215149 |              | KU215240      | KU215363         |
| 198. |                | <i>Aframomum verrucosum</i>        | -                          | AF414492 | AF414545     | FJ848660      |                  |
| 199. |                | <i>Alpinia luteocarpa</i>          | 19880195 (BR)              | KU215125 | KU215001     | KU215220      | KU215342         |
| 200. |                | <i>Alpinia pupurata</i>            | 19880109 (BR)              | KU215126 | KU215002     | KU215221      | KU215343         |
| 201. |                | <i>Boesenbergia pandurata</i>      | 20040188-85 (BR)           |          | KU215139     | KU215016      |                  |
| 202. |                | <i>Boesenbergia</i> sp.            | 19710472 (BR)              | KU215135 | KU215012     | KU215229      |                  |
| 203. |                | <i>Cautleya lutea</i>              | 20091405-86 (BR)           | KU215141 | KU215018     | KU215234      | KU215355         |
| 204. |                | <i>Curcuma longa</i>               | 19670244 (BR)              | -        | KU215006     | KU215224      | KU215347         |
| 205. |                | <i>Curcuma zanthorrhiza</i>        | 19750147 (BR)              | KU215130 | KU215007     | -             | KU215348         |
| 206. |                | <i>Etlingera elatior</i>           | 19560132 (BR)              | -        | KU215025     | KU215242      | -                |
| 207. |                | <i>Etlingera yunnanensis</i>       | -                          | AF414468 | AF414521     | AY769809      | -                |
| 208. |                | <i>Globba schlombergii</i>         | 19741200 (BR)              | KU215143 | KU215020     | KU215236      | KU215357         |
| 209. |                | <i>Hedychium corosarium</i>        | 19870230 (BR)              | KU215134 | KU215011     | KU215228      | -                |
| 210. |                | <i>Hedychium cylindrica</i>        | 19520915 (BR)              | KU215132 | KU215009     | KU215226      | KU215350         |
| 211. |                | <i>Kaempferia elegans</i>          | 20060023-35 (BR)           | KU215138 | KU215015     | KU215232      | KU215353         |
| 212. |                | <i>Hedychium flavescens</i>        | 19800483 (BR)              | KU215133 | KU215010     | KU215227      | KU215351         |
| 213. |                | <i>Hedychium horsfieldii</i>       | 19602071 (BR)              | KU215131 | KU215008     | KU215225      | KU215349         |
| 214. |                | <i>Kaempferia gibbertii</i>        | 19570275 (BR)              | KU215136 | KU215013     | KU215230      | KU215352         |
| 215. |                | <i>Kaempferia rotunda</i>          | 19074013 (BR)              | KU215137 | KU215014     | KU215231      | -                |
| 216. |                | <i>Kaempferia</i> sp.              | Van Caecenberghe s.n. (BR) | KU215146 | KU215022     | KU215238      | KU215360         |

| No.  | Family | Species                       | Accession                    | ITS      | <i>rps16</i> | <i>trnL-F</i> | <i>atpB-rbcL</i> |
|------|--------|-------------------------------|------------------------------|----------|--------------|---------------|------------------|
| 217. |        | <i>Reanalmia alpina</i>       | 19921107-23 (BR)             | KU215144 | KU215021     | -             | KU215358         |
| 218. |        | <i>Reanalmia nicolaioides</i> | 19750423 (BR)                | KU215140 | KU215017     | KU215233      | KU215354         |
| 219. |        | <i>Renealmia cernua</i>       | -                            | AF414476 | AF414529     | DQ444517      | -                |
| 220. |        | <i>Riedelia</i> sp.           | 19620382 (BR)                | KU215145 | -            | KU215237      | KU215359         |
| 221. |        | <i>Siphonochilus decorus</i>  | 19870078 (BR)                | -        | KU215026     | KU215243      | -                |
| 222. |        | <i>Siphonochilus kirkii</i>   | 20040213-13 (BR)             | KU215142 | KU215019     | KU215235      | KU215356         |
| 223. |        | <i>Zingiber darceyi</i>       | Van Caecckenberghe s.n. (BR) | KU215129 | KU215005     | -             | KU215346         |
| 224. |        | <i>Zingiber officinale</i>    | 19920009-89 (BR)             | -        | KU215027     | KU215244      | -                |
| 225. |        | <i>Zingiber papuarua</i>      | 19763771 (BR)                | KU215127 | KU215003     | KU215222      | KU215344         |
| 226. |        | <i>Zingiber zerumber</i>      | 19520932 (BR)                | KU215128 | KU215004     | KU215223      | KU215345         |

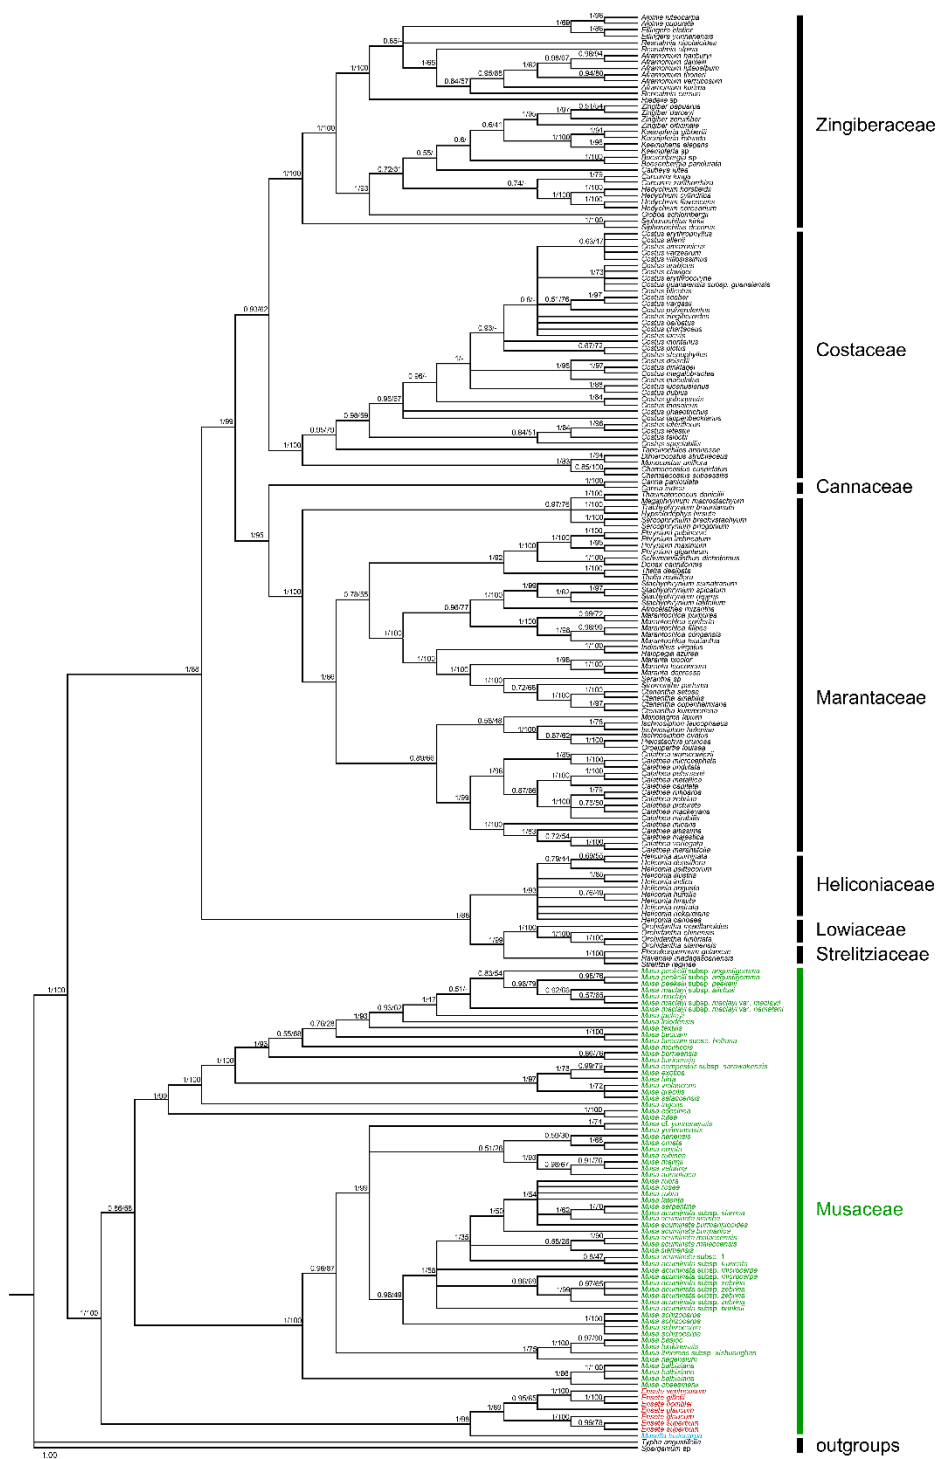

**Figure S1.** Bayesian 50% Majority role consensus cladogram of the combined ITS, *rps16*, *trnL-F* and *atpB-rbcL* dataset. The tree separated three genera including *Musa* (green), *Ensete* (red) and *Musella* (blue). Bayesian posterior probabilities (PP) and bootstrap supports are labelled on the nodes.

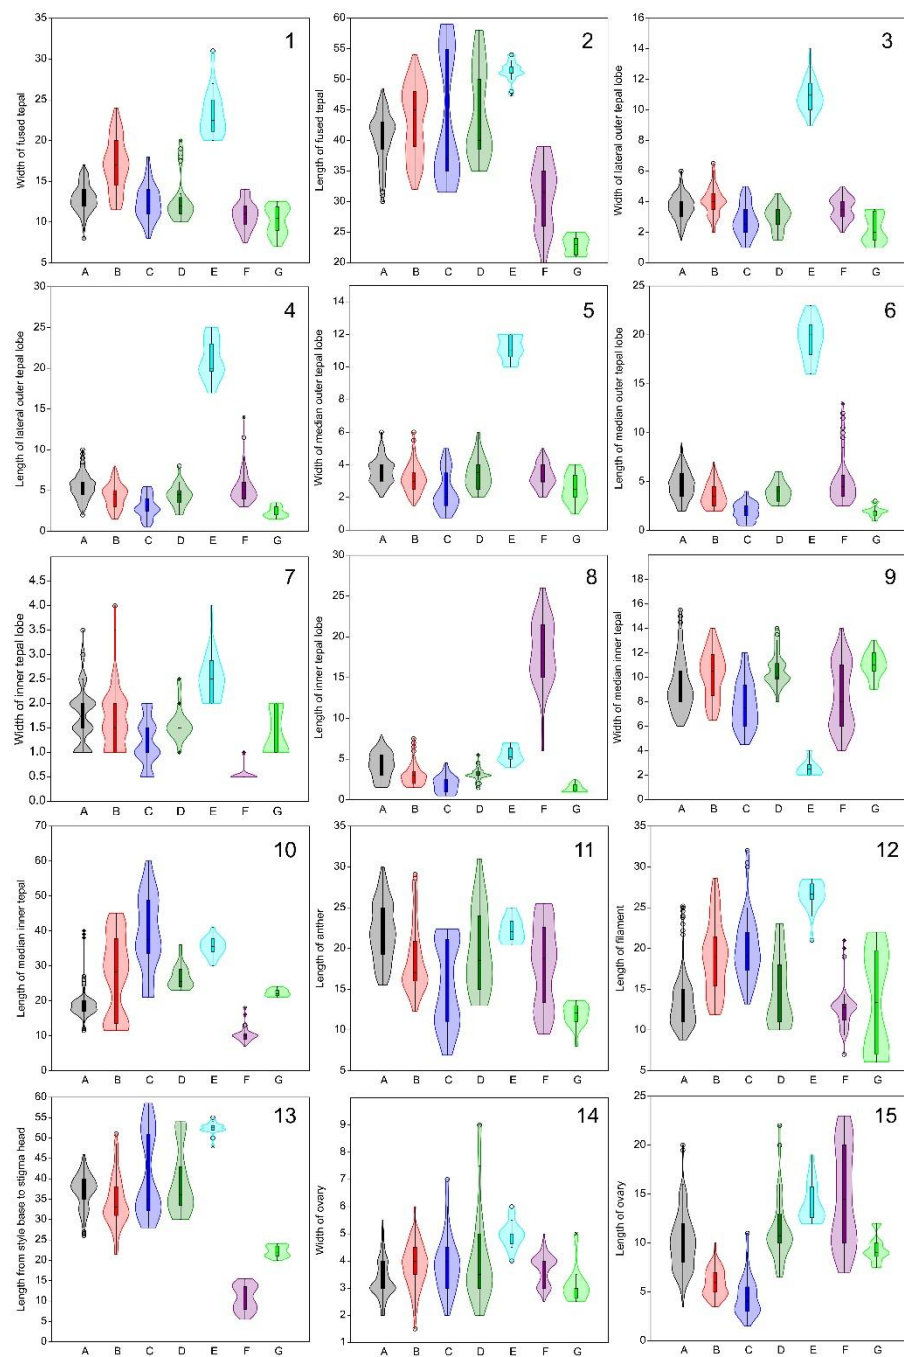

**Figure S2(1-15)** Distributed data of 15 measurements of male floral organs, (1) width of fused tepal, (2) length of fused tepal, (3) width of lateral outer tepal lobe, (4) length of lateral outer tepal lobe, (5) width of median outer tepal lobe, (6) length of median outer tepal lobe, (7) width of inner tepal lobe, (8) length of inner tepal lobe, (9) width of median inner tepal, (10) length of median inner tepal, (11) length of anther, (12) length of filament, (13) length from style base to stigma head, (14) width of ovary and (15) length of ovary. Dots and stars indicate outlying values. The banana groups are labelled as follows: (A) the section *Musa*, (B) the section *Rhodochlamys*, (C) the section *Callimusa*, (D) the section *Australimusa*, (E) *Musa nanensis*, (F) *Ensete* and (G) *Musella*.
